# Supplementary material
Source: PubMed Central journal article supplement (PMC1440877)
Supplement: nar_34_7_e56__6.pdf [file nar_34_7_e56__6.pdf]

| <i>dbSNP ID</i> | <i>Polymorphism</i> | <i>TaqMan probes</i>                  |       | <i>PCR primers</i>           |
|-----------------|---------------------|---------------------------------------|-------|------------------------------|
| rs405509        | ApoE -219           | VIC-cccagtaat <b>T</b> cagacacc-Q-MGB | (fwd) | CTTGGCCCCCAGAATGGA           |
|                 |                     | FAM-ccagtaat <b>G</b> cagacacc-Q-MGB  | (rev) | CCCCACAGTCCCCAGGAA           |
| rs1800587       | IL-1 alpha -889     | VIC-ccttcaatg <b>C</b> tgttgcc-Q-MGB  | (fwd) | GCCACAGGAATTATAAAAGCTGAGAAA  |
|                 |                     | FAM-tcaatg <b>T</b> tgttgcc-Q-MGB     | (rev) | GGAGAAAGGAAGGCATGGATTTT      |
| rs16944         | IL-1 beta -511      | VIC-ctgcctc <b>C</b> ggagct-Q-MGB     | (fwd) | GAGGCTCCTGCAATTGACAGA        |
|                 |                     | FAM-ctgcctc <b>T</b> ggagct-Q-MGB     | (rev) | TCTCTACCTTGGGTGCTGTTCT       |
| rs1800795       | IL-6 -174           | VIC-cctttagcat <b>G</b> gcaagac-Q-MGB | (fwd) | GACGACCTAAGCTGCACTTTTC       |
|                 |                     | FAM-cctttagcat <b>C</b> gcaagac-Q-MGB | (rev) | GGGCTGATTGGAAACCTTATTAAGATTG |
| rs1800629       | TNF alpha -308      | VIC-cccgtcc <b>C</b> catgcc-Q-MGB     | (fwd) | CCAAAAGAAATGGAGGCAATAGGTT    |
|                 |                     | FAM-cccgtcc <b>T</b> catgcc-Q-MGB     | (rev) | GGACCCTGGAGGCTGAAC           |

**Supplementary Table 1.** Probes and primers used in the Custom TaqMan® Assays.
