# Supplementary material
Source: PubMed Central journal article supplement (PMC1440877)
Supplement: nar_34_7_e56__7.pdf [file nar_34_7_e56__7.pdf]

**Supplementary Table 2** PCR primer sets used to sequence genomic DNA of 14 selected healthy blood donors, as validation of the best cycle genotype algorithm (BCGA). *ApoE*, apolipoprotein E; *IL*, interleukin; *TNF*, tumor necrosis factor

| <i>Gene</i>   | <i>SNPs</i> | <i>Forward primer</i> | <i>Reverse primer</i> | <i>Length, bp</i> |
|---------------|-------------|-----------------------|-----------------------|-------------------|
| ApoE          | -219        | GCCTAGCCCCACTTTCTTTT  | AGGTGGGGCATAGAGGTCTT  | 575               |
| IL-1 $\alpha$ | -889        | TAGGCTGGCCACAGGAATTA  | GCCCAAGGTGTGTCTTCTGT  | 206               |
| IL-1 $\beta$  | -511        | GGCTAGGGTAACAGCACCTG  | GCCCTCCCTGTCTGTATTGA  | 221               |
| IL-6          | -174        | TTGTCAAGACATGCCAAAGTG | TCAGACATCTCCAGTCCTATA | 244               |
| TNF $\alpha$  | -308, -238  | CTCAGGACTCAACACAGCTT  | TCTGGAGGAAGCGGTAGTGG  | 383               |
