# Supplementary material
Source: PubMed Central journal article supplement (PMC1440877)

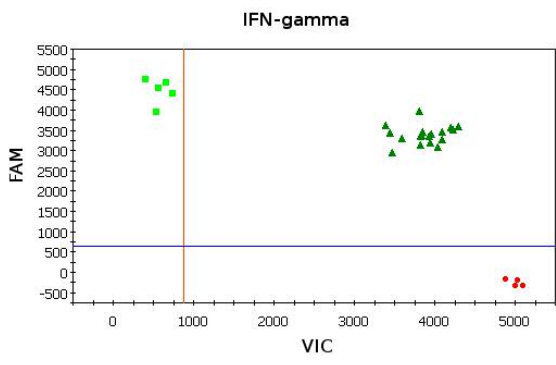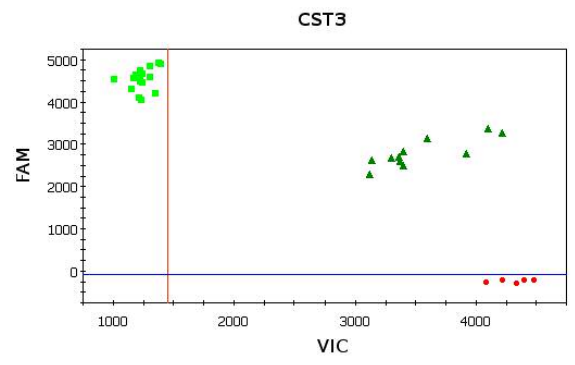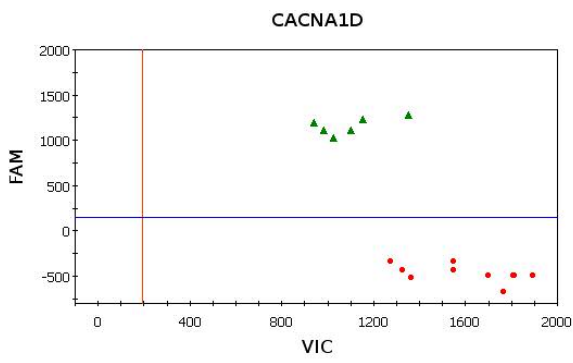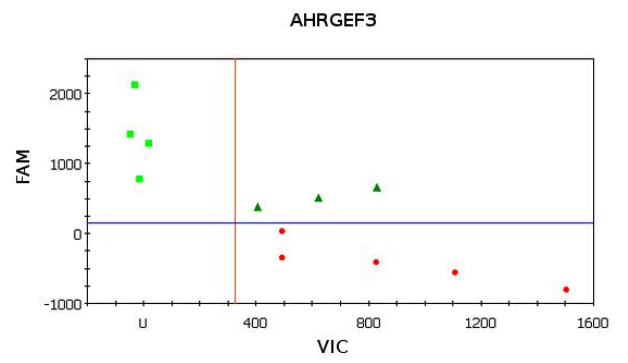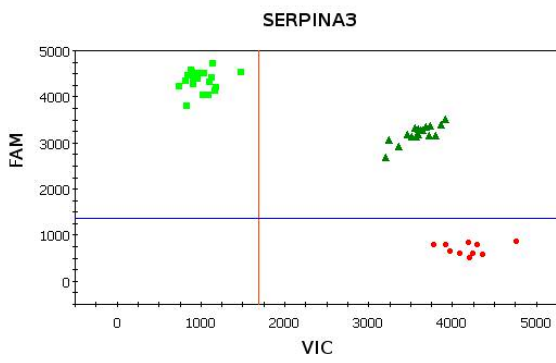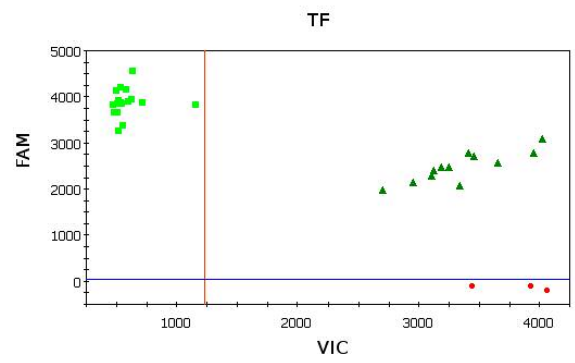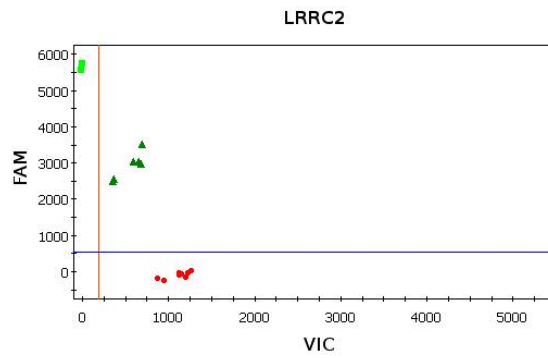

Supplement: nar_34_7_e56__1.pdf [file nar_34_7_e56__1.pdf]

**IFN-gamma**

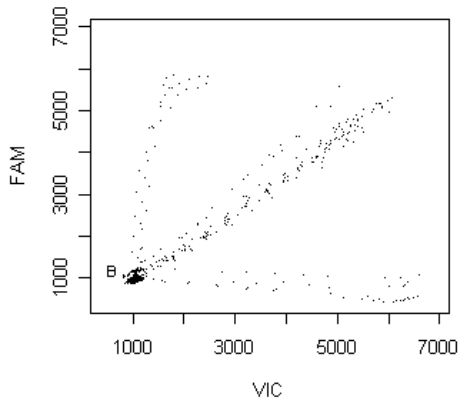

**CST3**

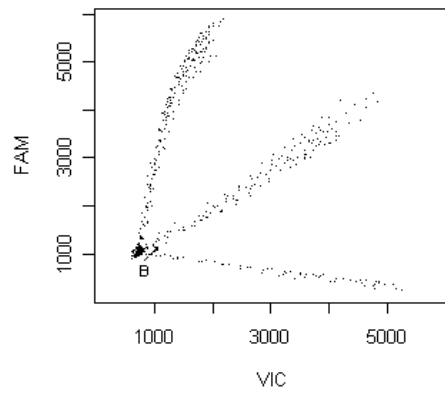

**CACNA1D**

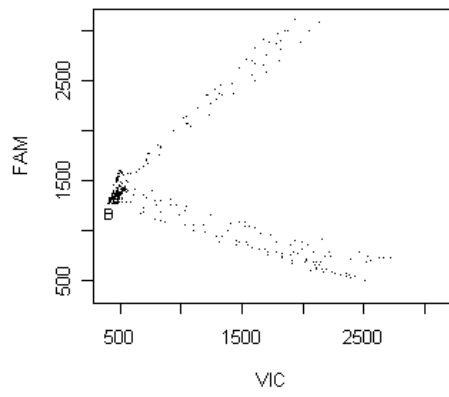

**AHRGEF3**

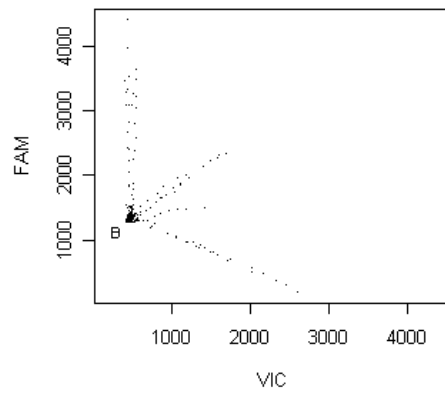

**SERPINA3**

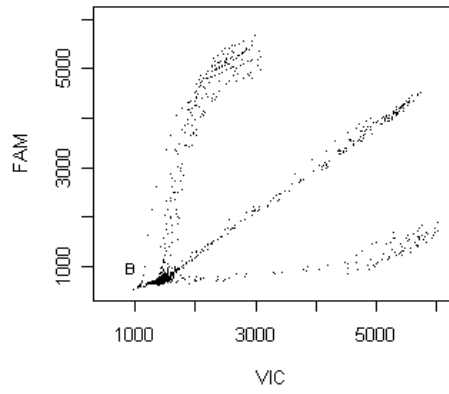

**TF**

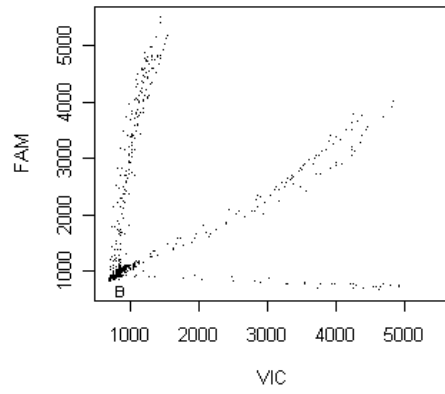

**LRRC2**

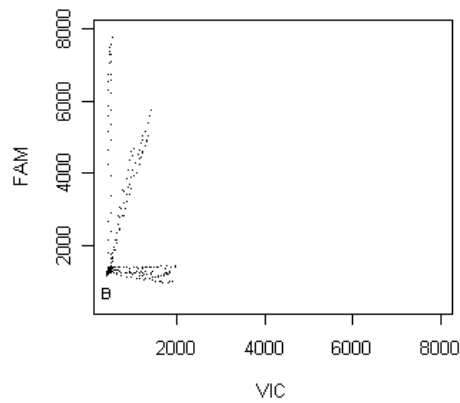

Supplement: nar_34_7_e56__2.pdf [file nar_34_7_e56__2.pdf]

**IFN-gamma**

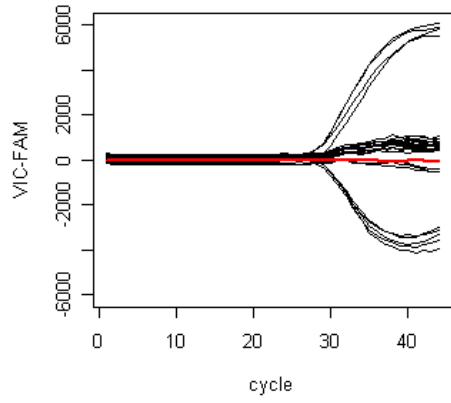

**CST3**

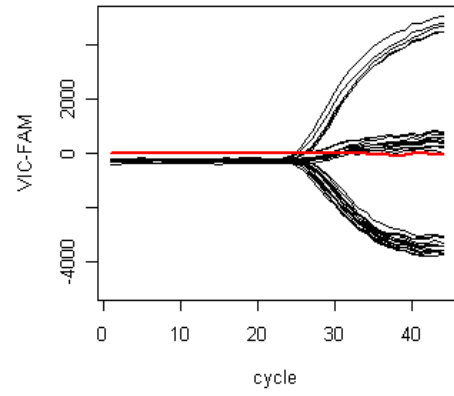

**CACNA1D**

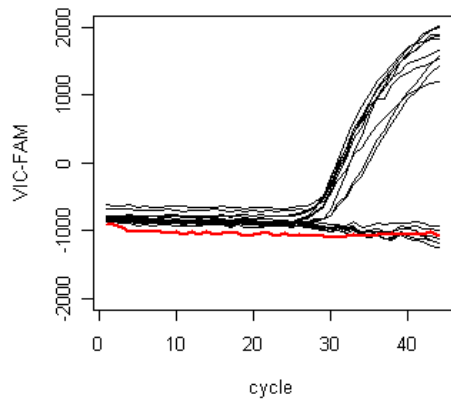

**AHRGEF3**

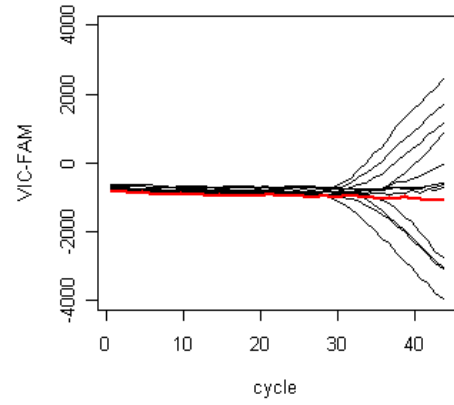

**SERPINA3**

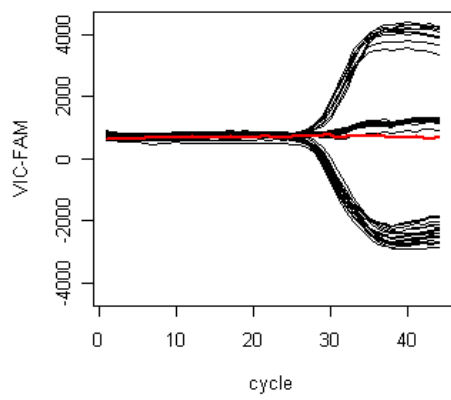

**TF**

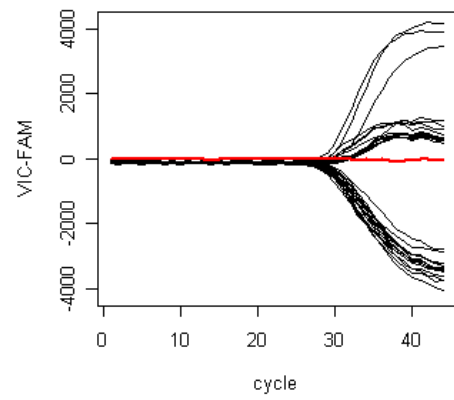

**LRRC2**

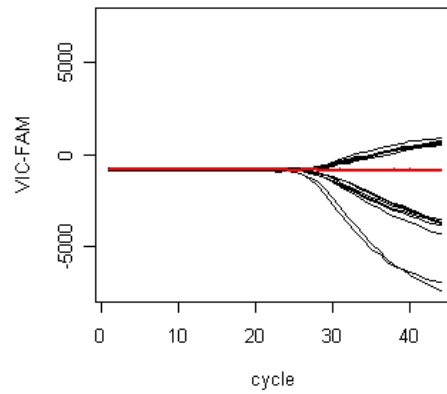

Supplement: nar_34_7_e56__3.pdf [file nar_34_7_e56__3.pdf]

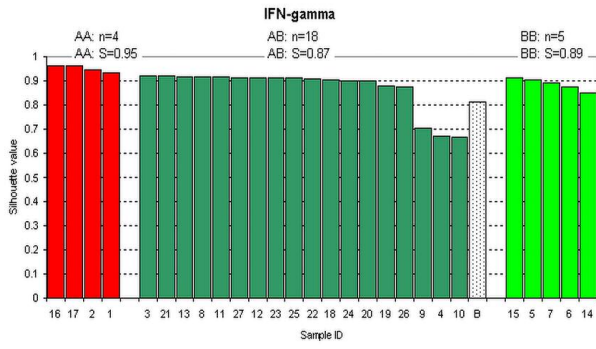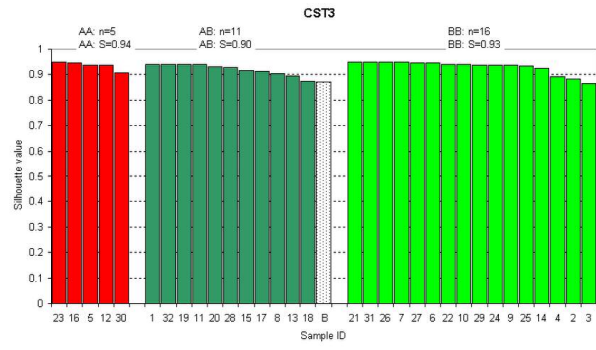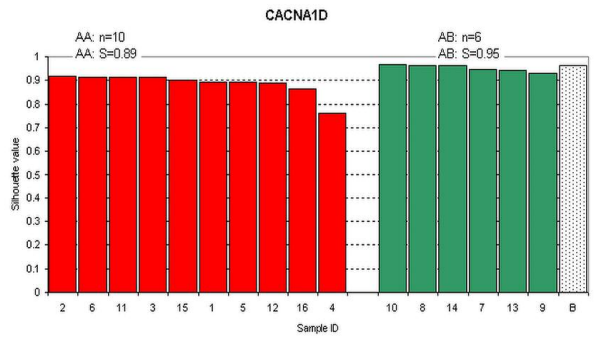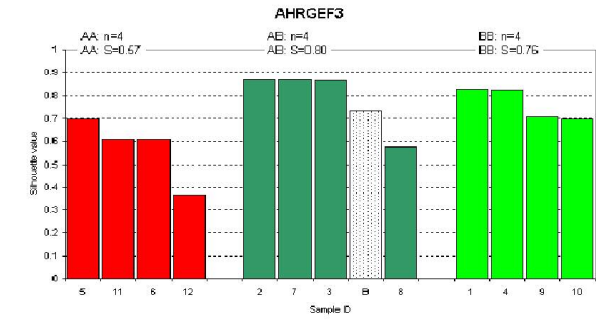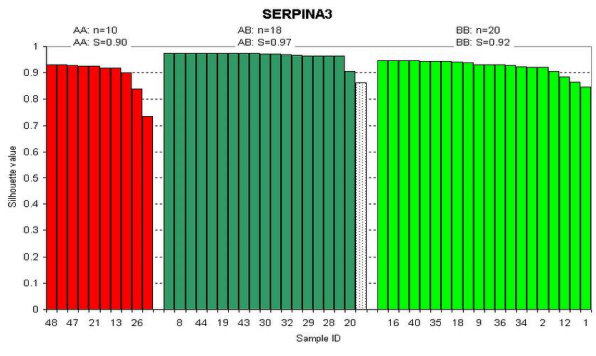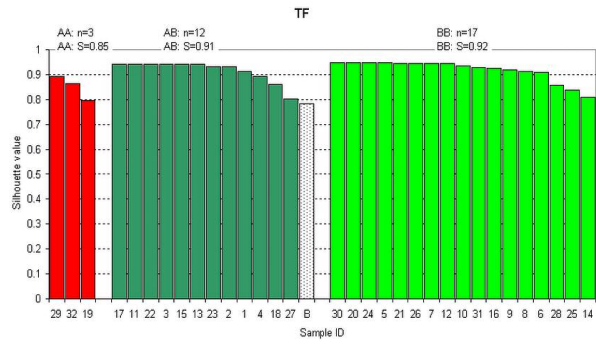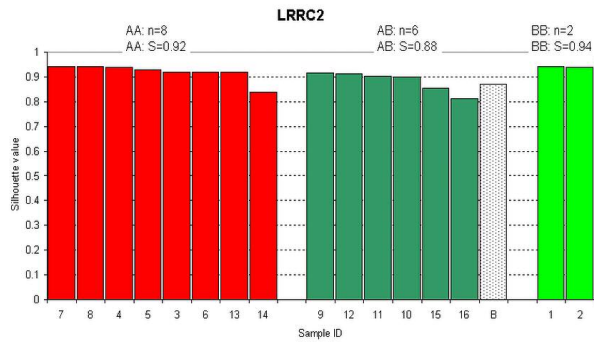

Supplement: nar_34_7_e56__4.pdf [file nar_34_7_e56__4.pdf]

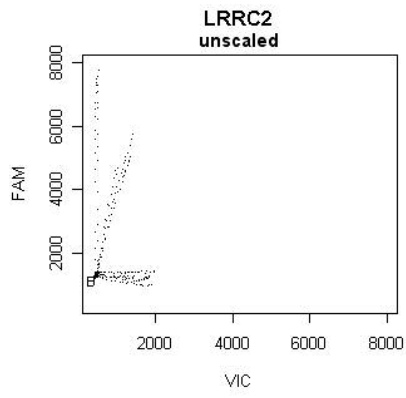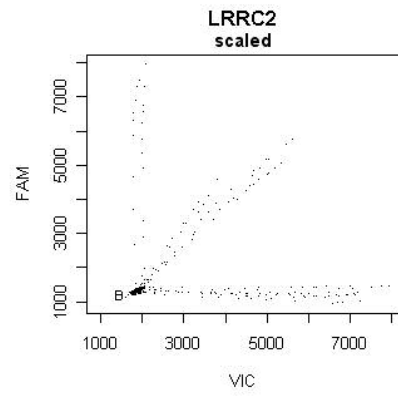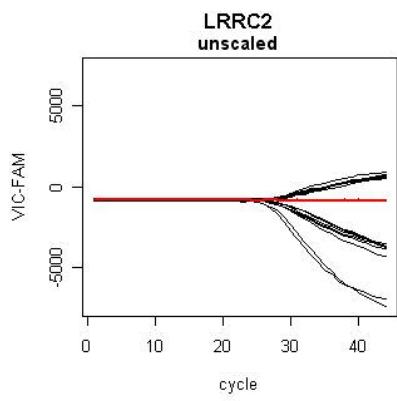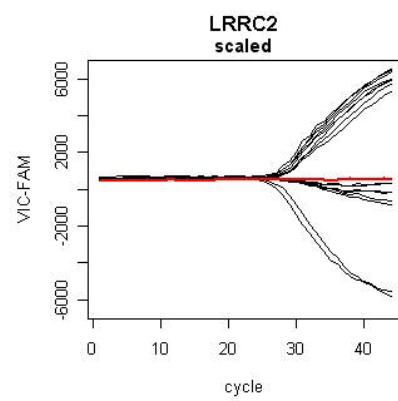

Supplement: nar_34_7_e56__5.pdf [file nar_34_7_e56__5.pdf]
